# Supplementary material for: Idiopathic pulmonary fibrosis predicts local recurrence following surgery in patients with non-small cell lung cancer
Source: Research Square preprint supplement (doi:10.21203/rs.3.rs-8306470/v1), 2025-12-15

**Supplementary Material**

**Supplementary Figure 1. The lung environment of IPF promotes lung metastasis of cancer cells.** (A) The establishment of a mouse model of bleomycin (BLM)-induced idiopathic pulmonary fibrosis (IPF). Hematoxylin and eosin (HE) staining and Masson trichrome (MT) staining of collagen revealed severe pulmonary damage and collagen deposition after BLM administration. (B)BLM-induced induced a significant elevation of pulmonary hydroxyproline when compared to PBS administration. (C) Quantitative histology according to Ashcroft’s method showed that the score significantly increased with BLM administration compared to PBS administration.


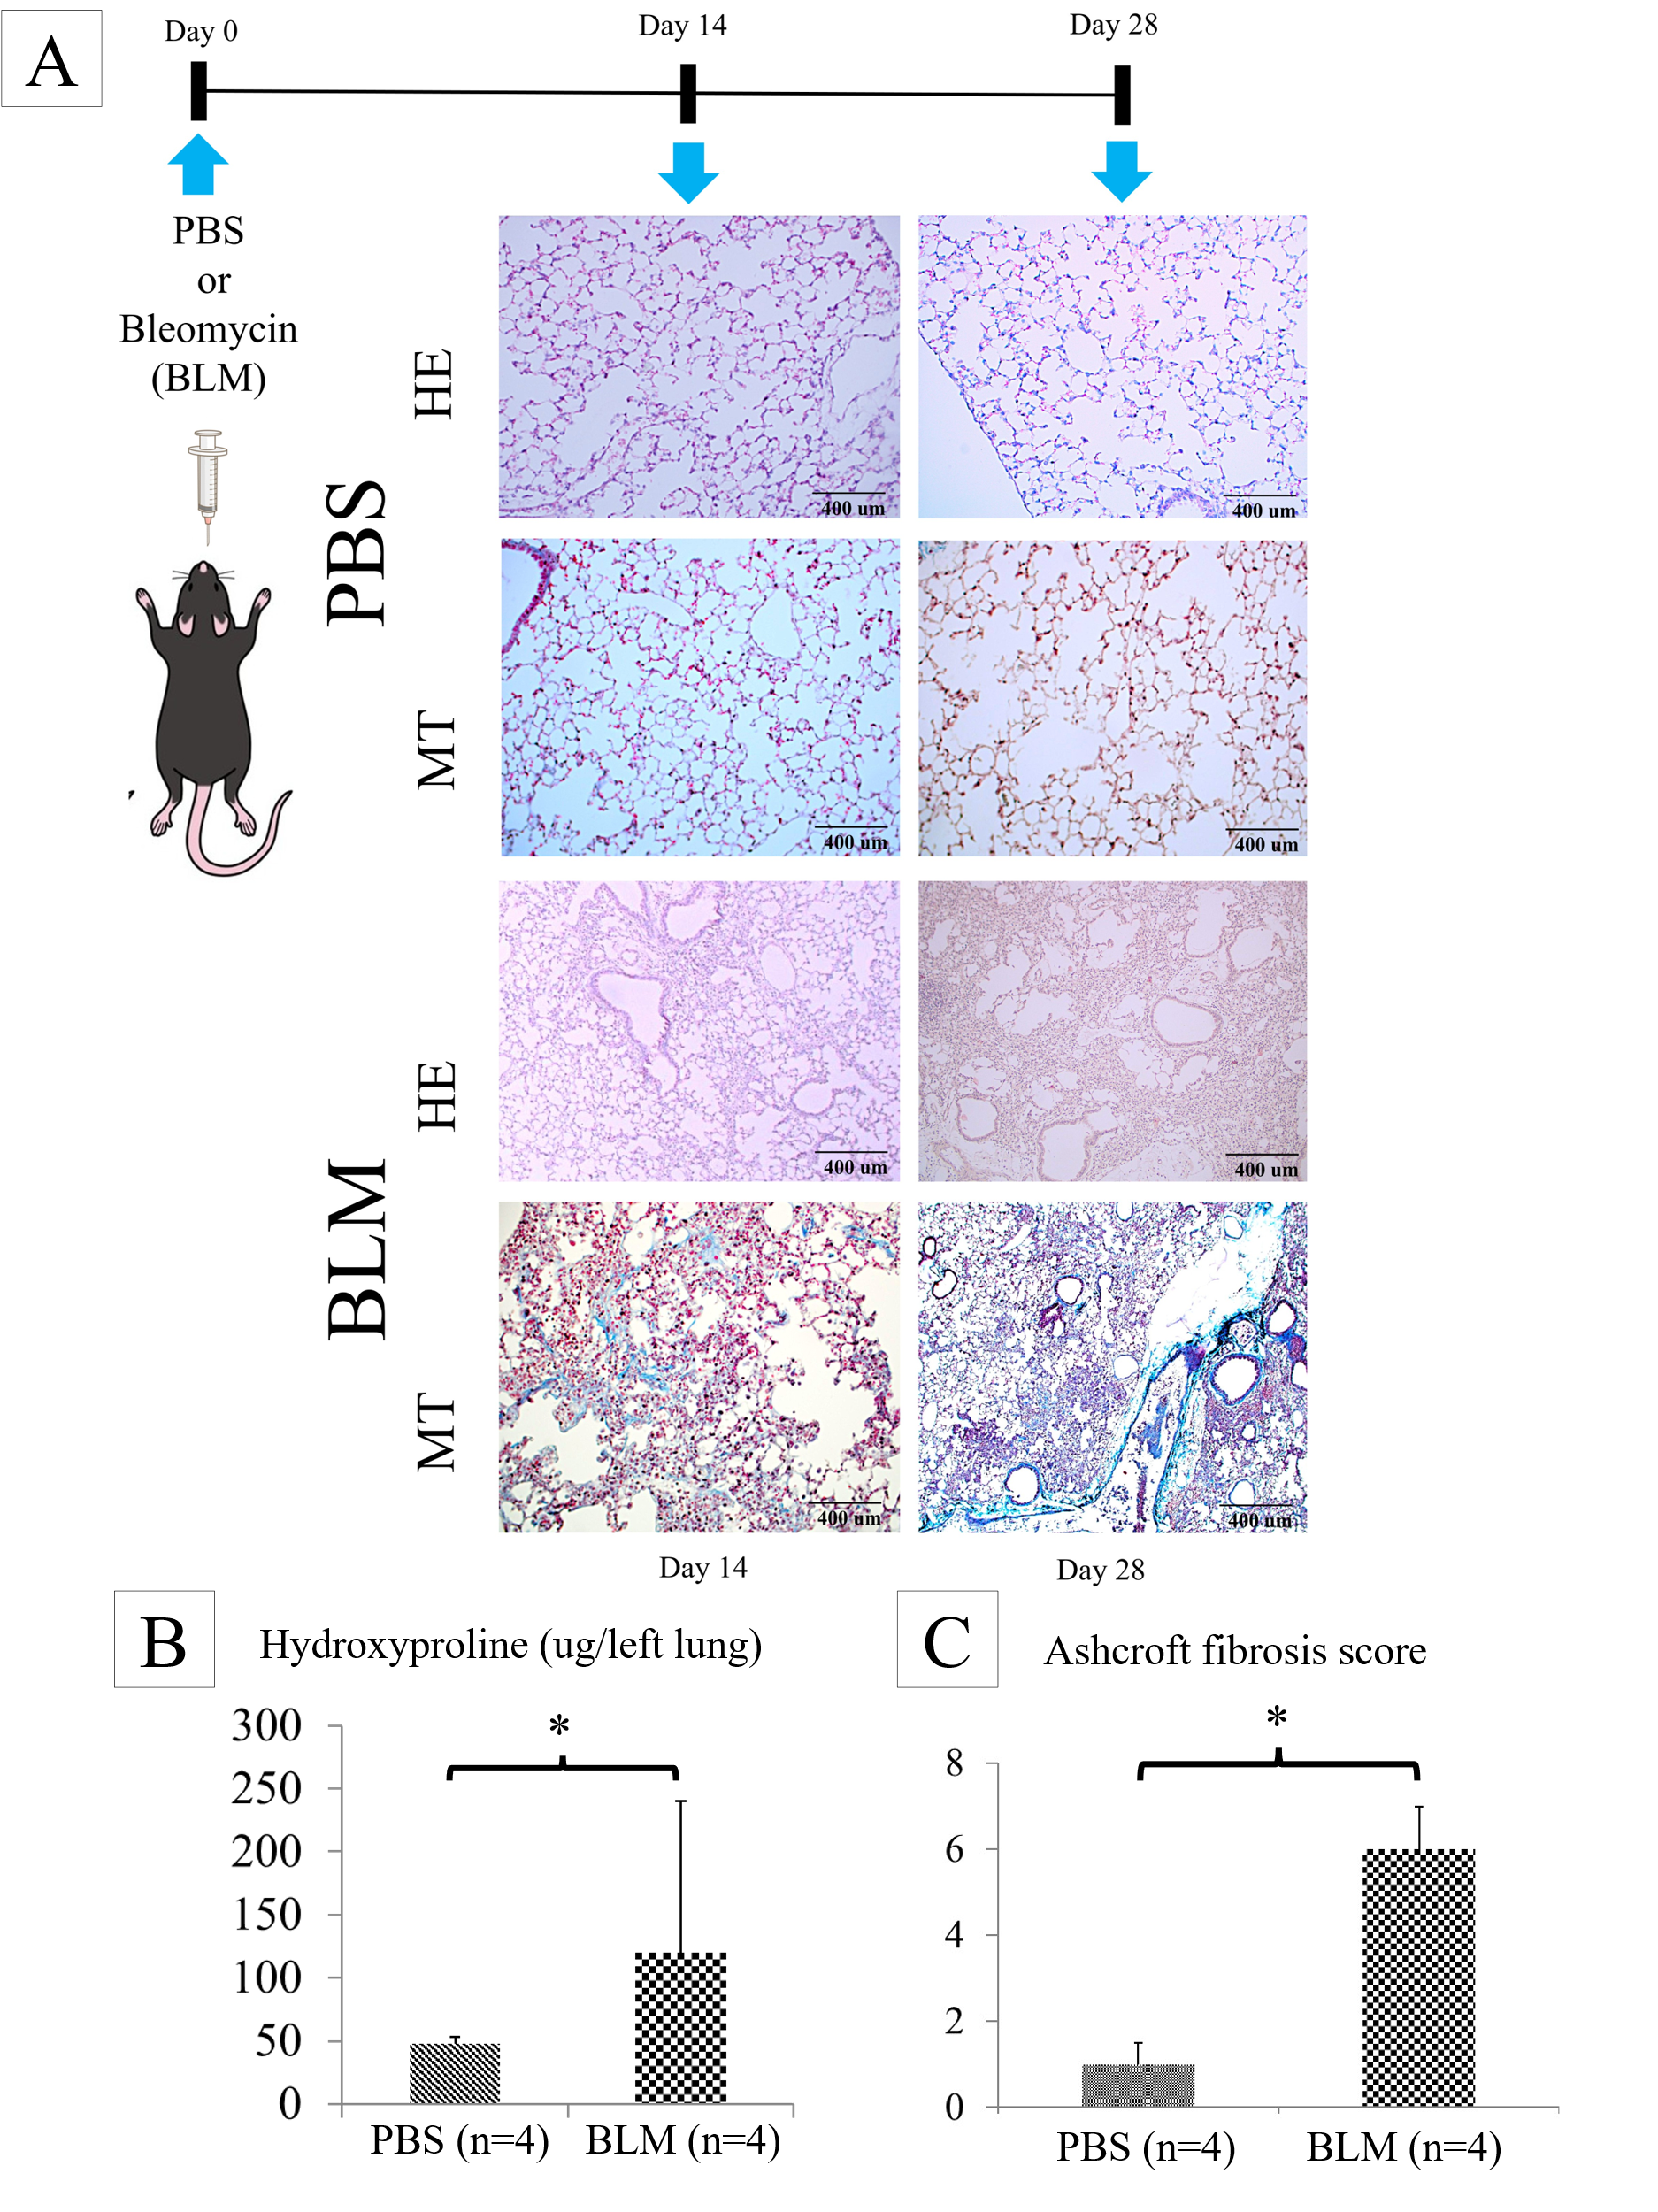


**Supplementary Figure 2.** **The pharmacological treatment of IPF by Pirfenidone (PFD)** (A) PFD (300 mg/kg/day, orally) was administered twice daily. HE and MT staining revealed that severe pulmonary damage and BLM-induced collagen deposition were clearly suppressed by PFD. (B) The BLM-induced elevation of pulmonary hydroxyproline was significantly suppressed. **P* < 0.05. (C) Quantitative histology, which was performed according to Ashcroft’s method, showed that PFD significantly attenuated the score in BLM-treated mice. **P* < 0.05.


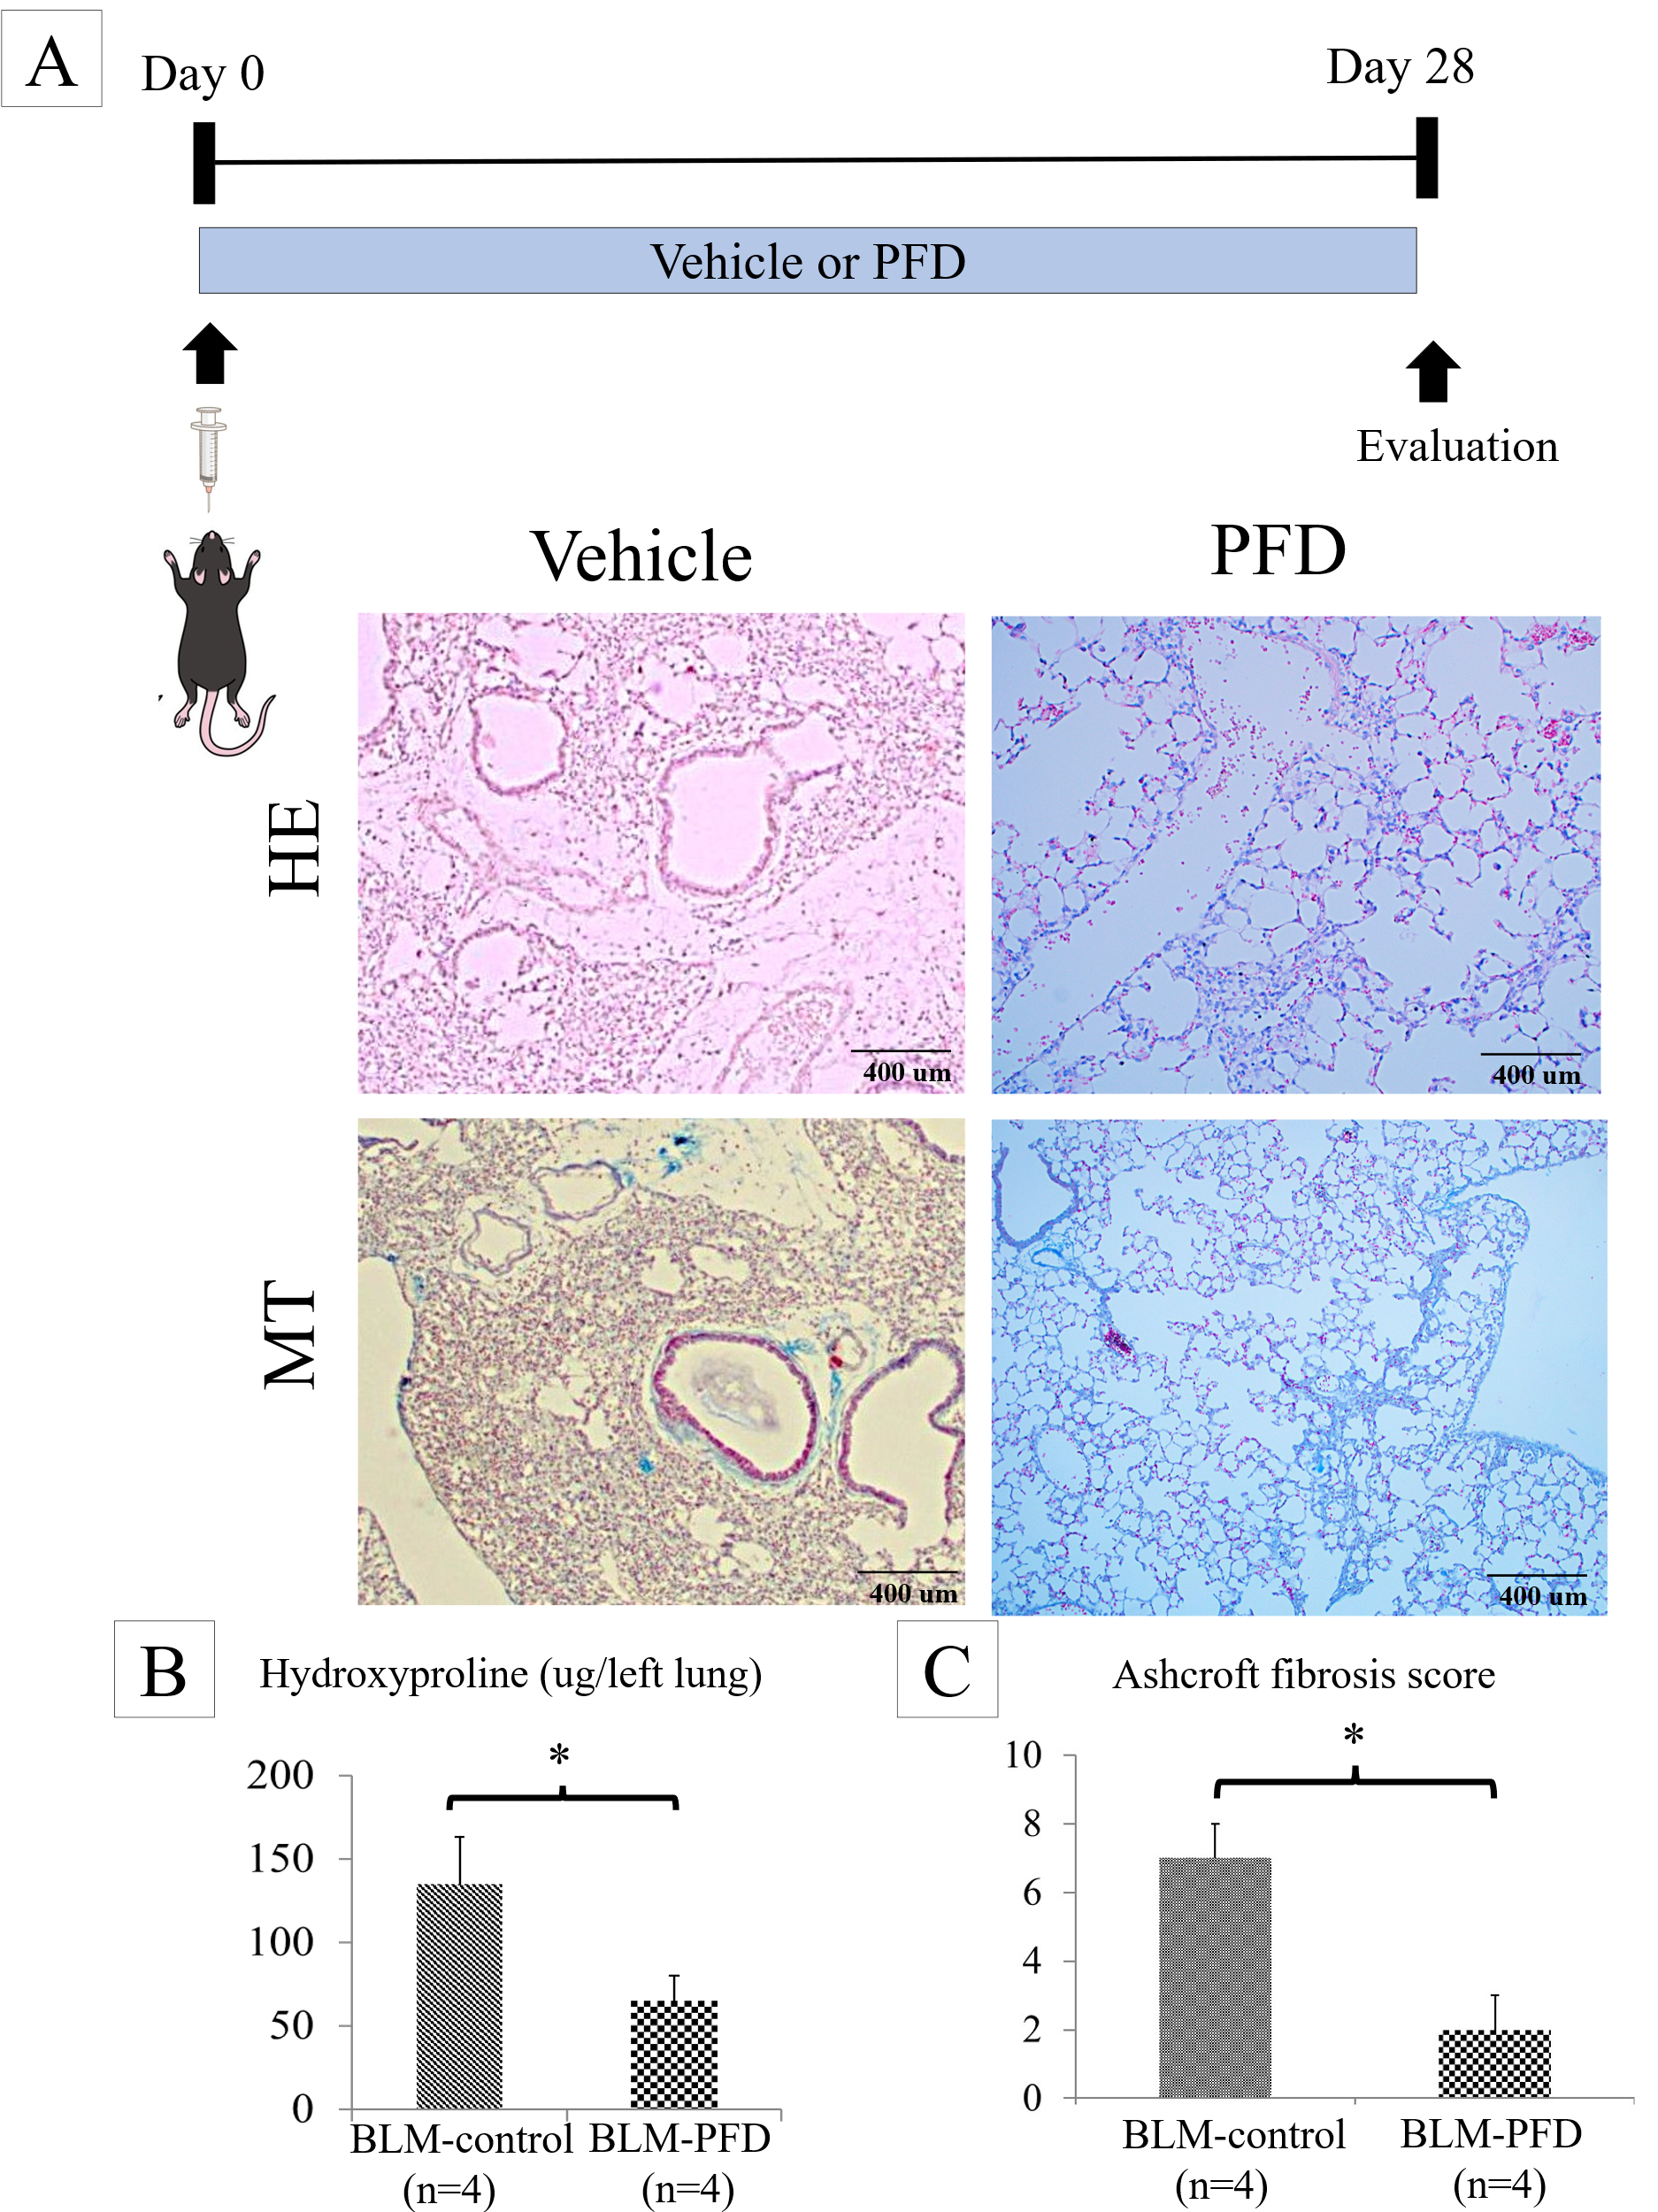

Supplement: Supplementary file 1 [file 89a6450b75b467829d9bb2bc.docx]
